# Supplementary material for: Combined Therapy of Vitamin D3-Tolerogenic Dendritic Cells and Interferon-β in a Preclinical Model of Multiple Sclerosis
Source: MDPI journal article supplement (doi:10.3390/biomedicines9121758), 2021-11-24
Supplement: s1 [file s1]

Supplementary Table S1. Clinical and demographic data from multiple sclerosis patients participating in the in vitro study.

| ID        | MS type | Gender | Age (years) | First symptom of disease (years) | Previous treatment | Whashout period (months) | EDSS | ARR last year |
|-----------|---------|--------|-------------|----------------------------------|--------------------|--------------------------|------|---------------|
| Patient 1 | EMRR    | W      | 46          | 26                               | IFN-beta<br>NTZ    | 60                       | 3.0  | 2             |
| Patient 2 | EMRR    | W      | 50          | 17                               | IFN-beta           | 120                      | 2.0  | 0             |
| Patient 3 | EMRR    | M      | 50          | 22                               | IFN-beta           | 72                       | 5.0  | 0             |
| Patient 4 | EMRR    | W      | 26          | 3                                | NTZ<br>Fingo       | 4                        | 3.0  | 1             |
| Patient 5 | EMRR    | M      | 39          | 2                                | Naïve              | -                        | 1.0  | 2             |
| Patient 6 | EMRR    | W      | 30          | 0.5                              | Naïve              | -                        | 3.5  | 1             |

ARR: Annualized relapse rate; EDSS: Expanded Disability Status Scale; Fingo: Fingolimod; ID: Identification of patients; IFN-beta: interferon-beta; M: male; MS:Multiple Sclerosis; NTZ: natalizumab; W: woman.

Supplementary Table S2. Percentage of lymphocyte subpopulations from Multiple Sclerosis (MS) patients and Healthy Donors (HD) after 5 days co-cultured with mature DC (mDC) , 100%VitD3-tolDC or 50%VitD3-tolDC in the presence/absence of IFN-beta

|                                 |                          | RRMS  |       | HD    |       |
|---------------------------------|--------------------------|-------|-------|-------|-------|
|                                 | Condition                | Mean  | SD    | Mean  | SD    |
| CD4 T cells (%)                 | mDC+IFN-beta             | 73.90 | 12.16 | 63.48 | 8.57  |
|                                 | 100%VitD3-tolDC          | 72.30 | 11.71 | 63.47 | 9.34  |
|                                 | 100%VitD3-tolDC+IFN-beta | 72.78 | 12.83 | 64.25 | 9.64  |
|                                 | 50% VitD3-tolDC          | 72.38 | 12.24 | 63.57 | 9.50  |
|                                 | 50% VitD3-tolDC+IFN-beta | 71.55 | 11.52 | 63.92 | 8.55  |
| CD4 Naïve T cells (%)           | mDC                      | 37.95 | 17.27 | 55.7  | 19.11 |
|                                 | mDC+IFN-beta             | 39.45 | 14.13 | 55.85 | 19.28 |
|                                 | 100%VitD3-tolDC          | 44.38 | 19.56 | 62.33 | 17.68 |
|                                 | 100%VitD3-tolDC+IFN-beta | 44.85 | 14.68 | 59.22 | 16.58 |
|                                 | 50% VitD3-tolDC          | 40.25 | 13.28 | 59.30 | 17.53 |
|                                 | 50% VitD3-tolDC+IFN-beta | 43.15 | 13.59 | 58.32 | 16.05 |
| CD4 Central Memory T cells (%)  | Mdc                      | 45.40 | 11.55 | 31.93 | 15.58 |
|                                 | mDC+IFN-beta             | 40.75 | 7.05  | 32.33 | 16.12 |
|                                 | 100%VitD3-tolDC          | 30.88 | 9.50  | 25.40 | 12.04 |
|                                 | 100%VitD3-tolDC+IFN-beta | 35.40 | 7.65  | 27.37 | 11.56 |
|                                 | 50% VitD3-tolDC          | 39.43 | 9.18  | 27.87 | 13.78 |
|                                 | 50% VitD3-tolDC+IFN-beta | 37.15 | 5.67  | 28.32 | 12.55 |
| CD4 Effector Memory T cells (%) | mDC                      | 14.65 | 6.60  | 10.23 | 5.49  |
|                                 | mDC+IFN-beta             | 17.28 | 9.69  | 9.95  | 4.79  |
|                                 | 100%VitD3-tolDC          | 21.33 | 18.82 | 10.22 | 6.42  |
|                                 | 100%VitD3-tolDC+IFN-beta | 17.28 | 10.73 | 11.00 | 5.88  |
|                                 | 50% VitD3-tolDC          | 18.03 | 10.14 | 10.65 | 5.21  |
|                                 | 50% VitD3-tolDC+IFN-beta | 17.45 | 11.46 | 11.22 | 5.24  |
| CD4 Effector T cells (%)        | mDC                      | 1.97  | 1.32  | 2.28  | 2.83  |
|                                 | mDC+IFN-beta             | 2.53  | 1.50  | 1.82  | 2.33  |
|                                 | 100%VitD3-tolDC          | 3.47  | 2.02  | 2.03  | 2.16  |
|                                 | 100%VitD3-tolDC+IFN-beta | 2.47  | 1.51  | 1.93  | 2.52  |
|                                 | 50% VitD3-tolDC          | 2.27  | 1.33  | 2.17  | 2.38  |
|                                 | 50% VitD3-tolDC+IFN-beta | 2.27  | 1.54  | 2.13  | 2.51  |
| CD4 Activated T cells (%)       | mDC                      | 14.03 | 3.73  | 11.50 | 8.11  |
|                                 | mDC+IFN-beta             | 12.68 | 4.92  | 9.28  | 5.95  |
|                                 | 100%VitD3-tolDC          | 4.95  | 1.71  | 5.16  | 2.60  |
|                                 | 100%VitD3-tolDC+IFN-beta | 4.27  | 1.68  | 5.25  | 2.42  |
|                                 | 50% VitD3-tolDC          | 8.13  | 3.58  | 8.01  | 4.85  |
|                                 | 50% VitD3-tolDC+IFN-beta | 10.10 | 4.77  | 7.21  | 4.63  |
| Th1 cells (%)                   | mDC                      | 41.85 | 18.21 | 35.05 | 9.04  |
|                                 | mDC+IFN-beta             | 38.25 | 13.64 | 31.07 | 11.30 |

|                                 |                          |       |       |       |       |
|---------------------------------|--------------------------|-------|-------|-------|-------|
|                                 | 100%VitD3-tolDC          | 36.55 | 16.08 | 31.35 | 5.52  |
|                                 | 100%VitD3-tolDC+IFN-beta | 32.00 | 15.77 | 30.78 | 10.43 |
|                                 | 50% VitD3-tolDC          | 38.53 | 10.51 | 32.55 | 8.18  |
|                                 | 50% VitD3-tolDC+IFN-beta | 33.18 | 13.53 | 33.38 | 9.73  |
| Th2 cells (%)                   | mDC                      | 32.48 | 4.05  | 30.93 | 4.92  |
|                                 | mDC+IFN-beta             | 36.18 | 8.49  | 41.7  | 10.6  |
|                                 | 100%VitD3-tolDC          | 42.32 | 4.26  | 33.50 | 4.49  |
|                                 | 100%VitD3-tolDC+IFN-beta | 46.42 | 5.12  | 42.43 | 2.41  |
|                                 | 50% VitD3-tolDC          | 39.66 | 6.66  | 39.05 | 8.66  |
|                                 | 50% VitD3-tolDC+IFN-beta | 49.30 | 10.43 | 43.63 | 9.63  |
| Th17 cells (%)                  | mDC                      | 11.40 | 5.03  | 14.31 | 3.04  |
|                                 | mDC+IFN-beta             | 10.66 | 5.73  | 10.51 | 1.94  |
|                                 | 100%VitD3-tolDC          | 17.92 | 5.71  | 18.80 | 4.82  |
|                                 | 100%VitD3-tolDC+IFN-beta | 1.51  | 4.93  | 15.04 | 5.65  |
|                                 | 50% VitD3-tolDC          | 13.02 | 4.72  | 17.63 | 3.42  |
|                                 | 50% VitD3-tolDC+IFN-beta | 11.86 | 4.72  | 13.10 | 2.41  |
| Treg cells (%)                  | mDC                      | 10.61 | 7.16  | 11.02 | 6.25  |
|                                 | mDC+IFN-beta             | 10.07 | 6.65  | 11.75 | 7.77  |
|                                 | 100%VitD3-tolDC          | 7.96  | 5.85  | 8.54  | 5.69  |
|                                 | 100%VitD3-tolDC+IFN-beta | 6.78  | 5.53  | 8.69  | 5.01  |
|                                 | 50% VitD3-tolDC          | 7.86  | 4.81  | 10.58 | 7.05  |
|                                 | 50% VitD3-tolDC+IFN-beta | 6.85  | 5.26  | 9.79  | 6.70  |
| CD8 T cells (%)                 | mDC                      | 20.98 | 8.79  | 27.82 | 6.93  |
|                                 | mDC+IFN-beta             | 21.63 | 8.68  | 27.48 | 7.13  |
|                                 | 100%VitD3-tolDC          | 21.03 | 8.26  | 27.03 | 6.88  |
|                                 | 100%VitD3-tolDC+IFN-beta | 21.05 | 7.78  | 29.72 | 12.86 |
|                                 | 50% VitD3-tolDC          | 22.75 | 7.89  | 27.35 | 7.27  |
|                                 | 50% VitD3-tolDC+IFN-beta | 21.90 | 8.16  | 27.38 | 7.16  |
| CD8 Naïve T cells (%)           | mDC                      | 43.60 | 10.45 | 54.12 | 8.42  |
|                                 | mDC+IFN-beta             | 44.80 | 13.98 | 55.00 | 8.12  |
|                                 | 100%VitD3-tolDC          | 52.25 | 16.05 | 62.28 | 7.93  |
|                                 | 100%VitD3-tolDC+IFN-beta | 53.05 | 16.08 | 60.63 | 6.19  |
|                                 | 50% VitD3-tolDC          | 46.00 | 16.03 | 58.53 | 3.26  |
|                                 | 50% VitD3-tolDC+IFN-beta | 52.70 | 15.04 | 57.60 | 6.94  |
| CD8 Central Memory T cells (%)  | mDC                      | 26.63 | 10.76 | 17.08 | 10.72 |
|                                 | mDC+IFN-beta             | 22.60 | 8.15  | 16.03 | 9.93  |
|                                 | 100%VitD3-tolDC          | 16.38 | 8.45  | 11.13 | 8.51  |
|                                 | 100%VitD3-tolDC+IFN-beta | 14.38 | 9.44  | 12.07 | 8.22  |
|                                 | 50% VitD3-tolDC          | 22.98 | 11.81 | 13.62 | 8.59  |
|                                 | 50% VitD3-tolDC+IFN-beta | 19.13 | 8.55  | 13.63 | 8.21  |
| CD8 Effector Memory T cells (%) | mDC                      | 18.23 | 7.55  | 19.50 | 6.83  |
|                                 | mDC+IFN-beta             | 20.38 | 9.57  | 18.67 | 5.56  |
|                                 | 100%VitD3-tolDC          | 17.45 | 8.38  | 16.88 | 6.31  |
|                                 | 100%VitD3-tolDC+IFN-beta | 18.63 | 8.46  | 19.02 | 6.12  |
|                                 | 50% VitD3-tolDC          | 17.68 | 7.85  | 17.97 | 4.04  |

|                                 |                          |       |       |       |      |
|---------------------------------|--------------------------|-------|-------|-------|------|
|                                 | 50% VitD3-tolDC+IFN-beta | 15.80 | 9.25  | 19.20 | 6.12 |
| CD8<br>Effector T<br>cells (%)  | mDC                      | 11.53 | 10.69 | 9.78  | 5.83 |
|                                 | mDC+IFN-beta             | 12.25 | 10.03 | 9.35  | 5.36 |
|                                 | 100%VitD3-tolDC          | 13.90 | 12.31 | 12.23 | 4.95 |
|                                 | 100%VitD3-tolDC+IFN-beta | 13.95 | 12.76 | 10.50 | 5.59 |
|                                 | 50% VitD3-tolDC          | 13.35 | 14.33 | 10.48 | 5.59 |
|                                 | 50% VitD3-tolDC+IFN-beta | 12.38 | 12.38 | 10.42 | 5.29 |
| CD8<br>Activated<br>T cells (%) | mDC                      | 11.3  | 5.11  | 14.33 | 8.82 |
|                                 | mDC+IFN-beta             | 10.60 | 6.07  | 13.83 | 8.37 |
|                                 | 100%VitD3-tolDC          | 3.72  | 2.12  | 5.07  | 4.50 |
|                                 | 100%VitD3-tolDC+IFN-beta | 3.33  | 1.56  | 4.75  | 2.55 |
|                                 | 50% VitD3-tolDC          | 7.28  | 1.21  | 10.70 | 7.27 |
|                                 | 50% VitD3-tolDC+IFN-beta | 8.70  | 4.11  | 7.62  | 2.26 |

CD4+ (CD3+CD4+); CD4 Naïve (CD3+CD4+CCR7+CD45RA+); CD4 Central Memory (CD3+CD4+CCR7+CD45RA-); CD4 Effector Memory (CD3+CD4+CCR7-CD45RA+); CD4 Effector (CD3+CD4+CCR7-CD45RA-); CD4 Activated (CD3+ CD4+ HLA-DR+CD38+); Th1 (CD3+ CD4+ CXCR3+ CCR6-); Th2 (CD3+ CD4+CXCR3- CCR6-); Th17 (CD3+ CD4+ CXCR3- CCR6+); CD8+ (CD3+CD8+); CD8 Naïve (CD3+CD8+CCR7+CD45RA+); CD8 Central Memory (CD3+CD8+CCR7+CD45RA-); CD8 Effector Memory (CD3+CD8+CCR7-CD45RA+); CD8 Effector (CD3+CD8+CCR7-CD45RA-); CD8 Activated (CD3+ CD8+ HLA-DR+CD38+); IFN-beta= interferon-beta; mDC= mature dendritic cells; VitD3-tolDC= vitamin-D3 tolerogenic dendritic cells.
